# Supplementary material
Source: PubMed Central journal article supplement (PMC8010646)

# Western blotting image gels

## Hypothalamus

CRF  
~21 kDa

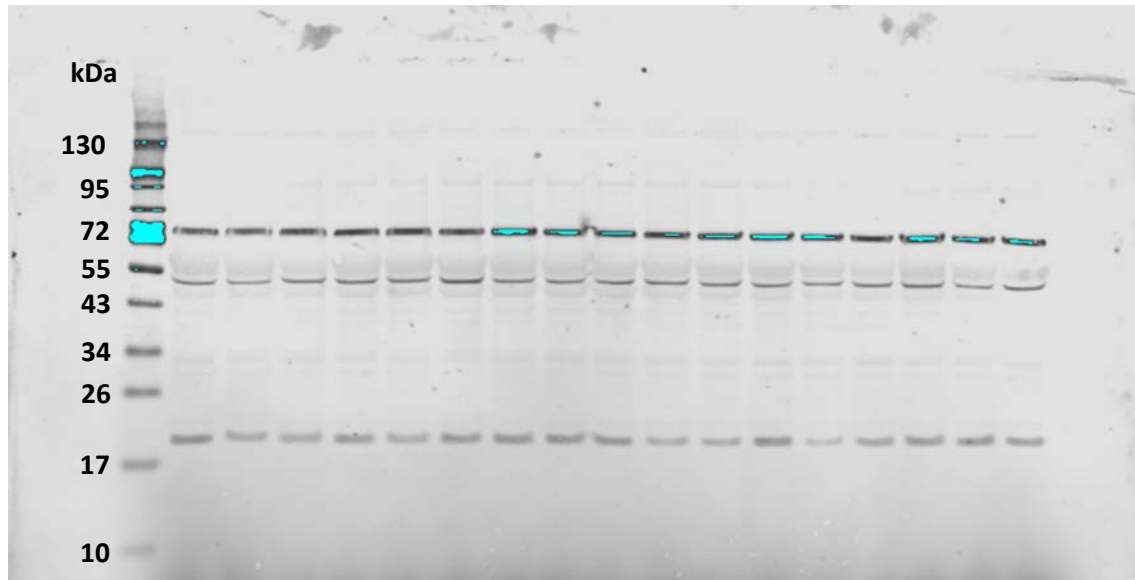

$\beta$ -actin  
42 kDa

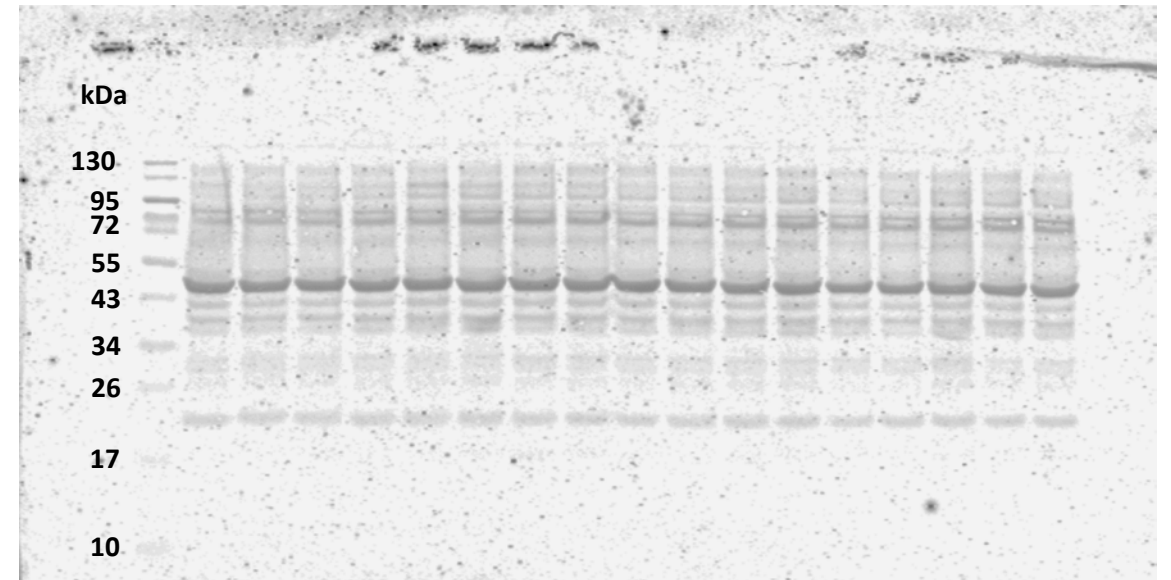

# Western blotting image gels

## Hippocampus

CRF  
~21 kDa

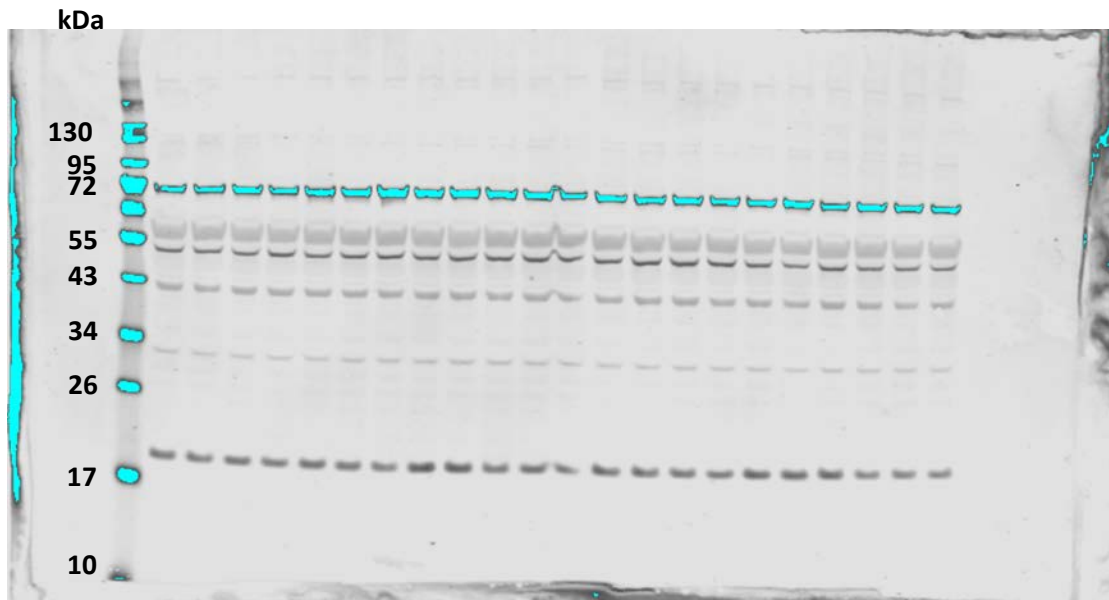

$\beta$ -actin  
42 kDa

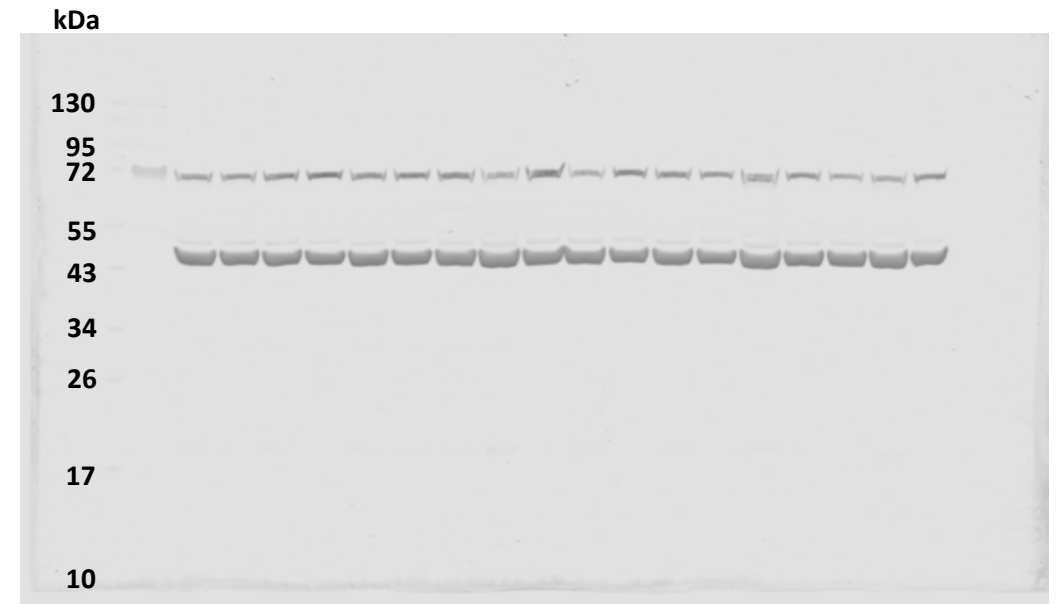

# Western blotting image gels

Central nucleus of amygdala

CRF  
~21 kDa

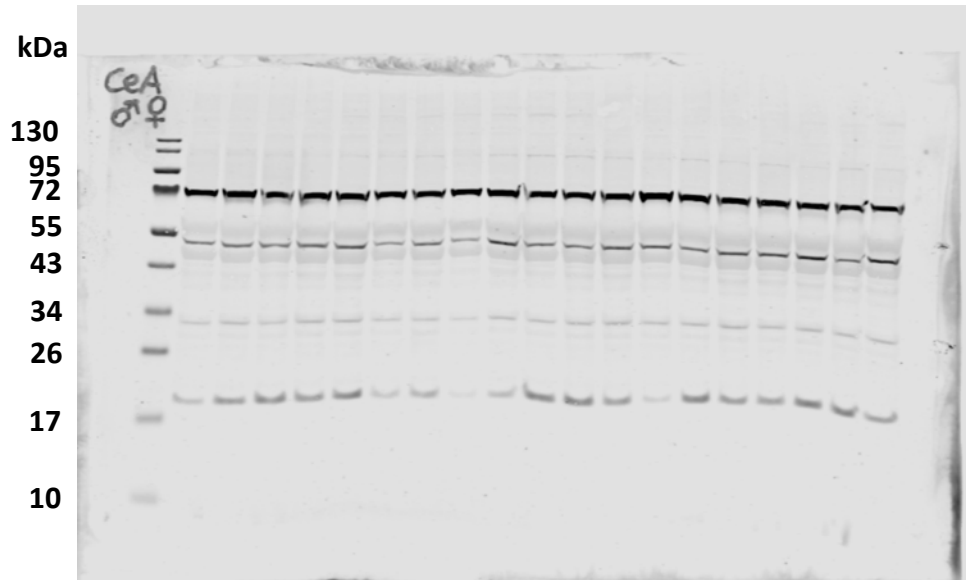

$\beta$ -actin  
42 kDa

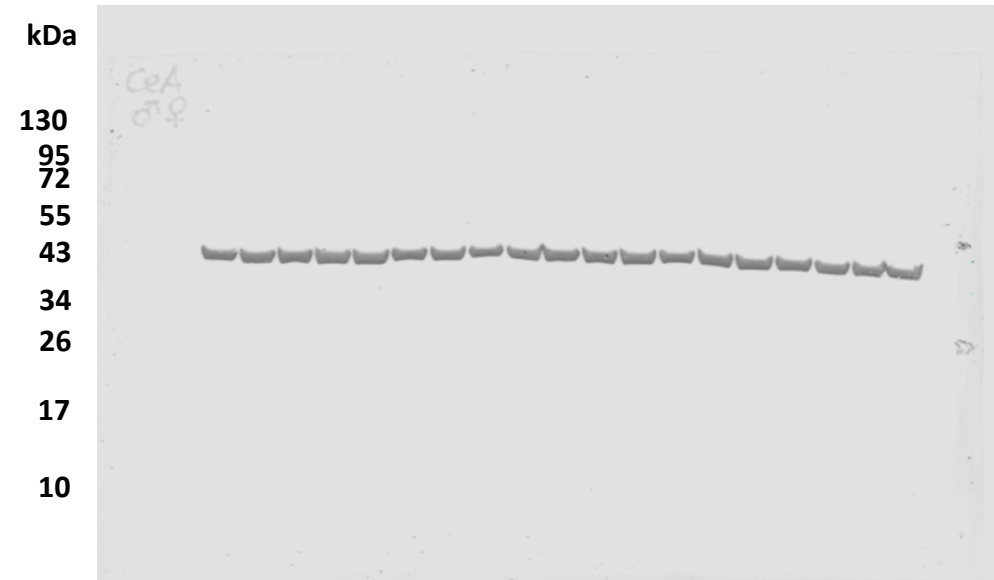

# Western blotting image gels

## Ventral tegmental area

**CRF**  
**~21 kDa**

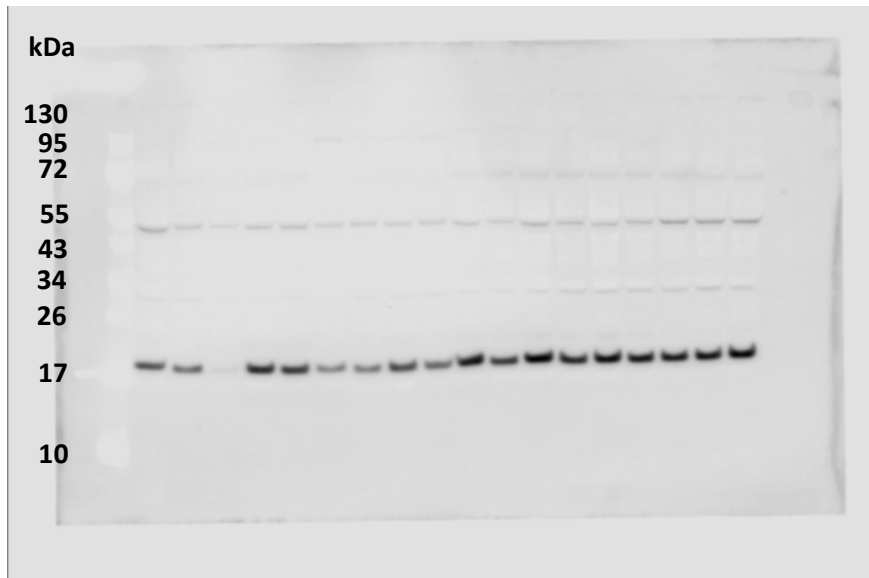

kDa

130  
95  
72  
55  
43  
34  
26  
17  
10

**$\beta$ -actin**  
**42 kDa**

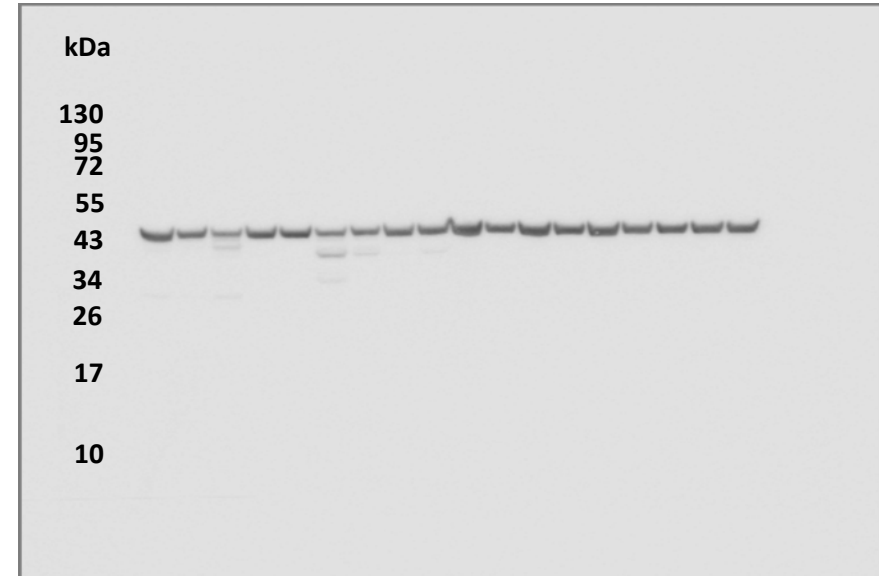

kDa

130  
95  
72  
55  
43  
34  
26  
17  
10

# Western blotting image gels

## Nucleus accumbens

CRF  
~21 kDa

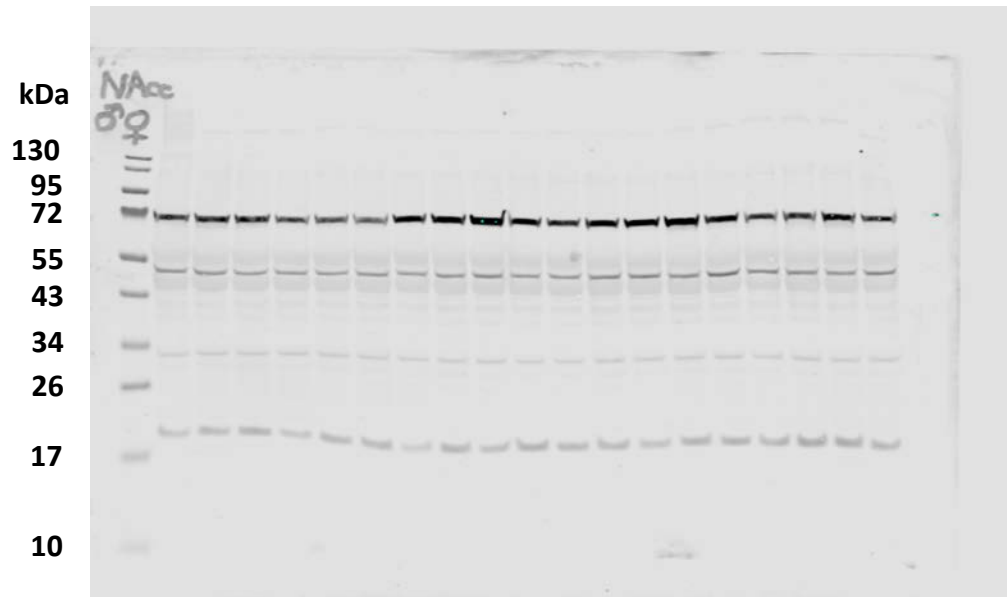

$\beta$ -actin  
42 kDa

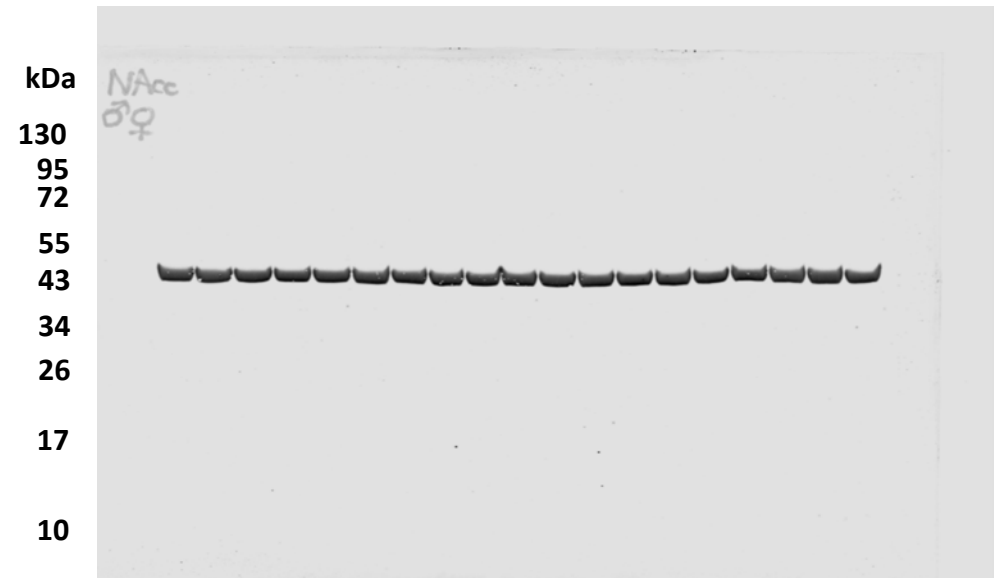

# qPCR curves

## Hypothalamus

### CRF

#### Melt Curve

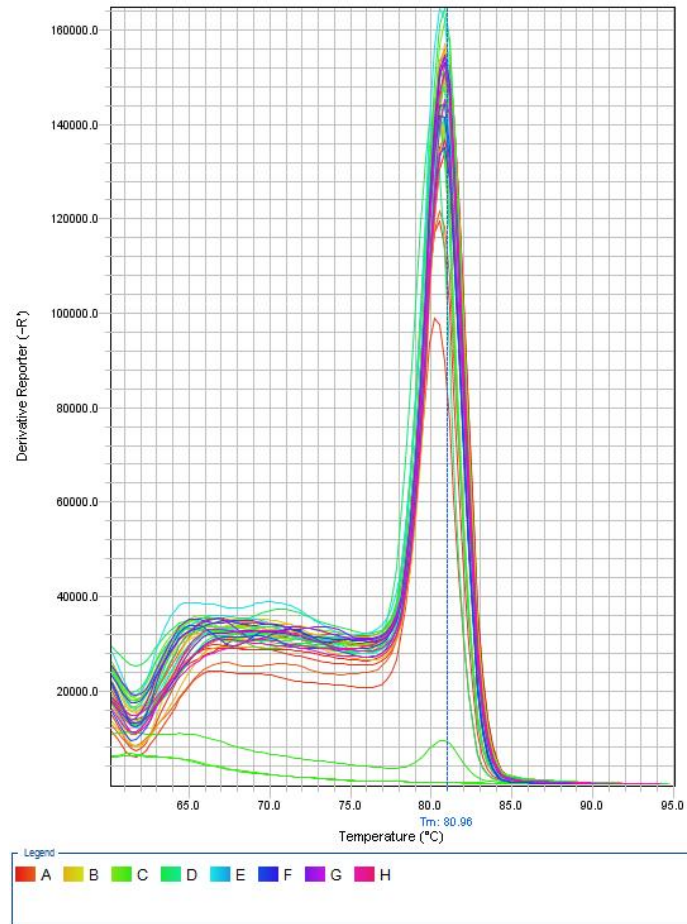

### GAPDH

#### Melt Curve

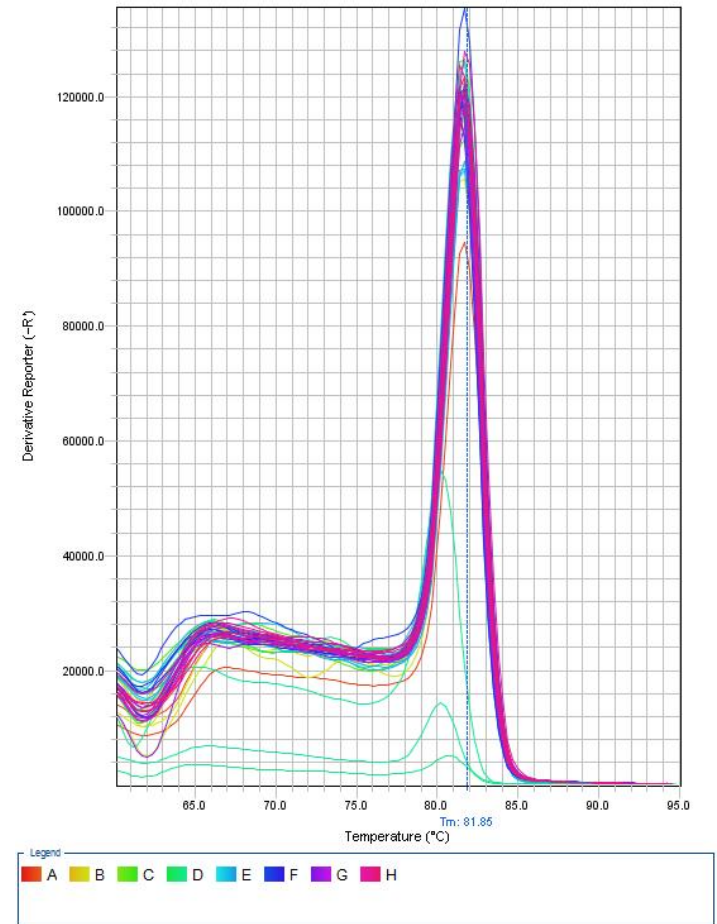

# qPCR curves

## Hippocampus

### CRF

#### Melt Curve

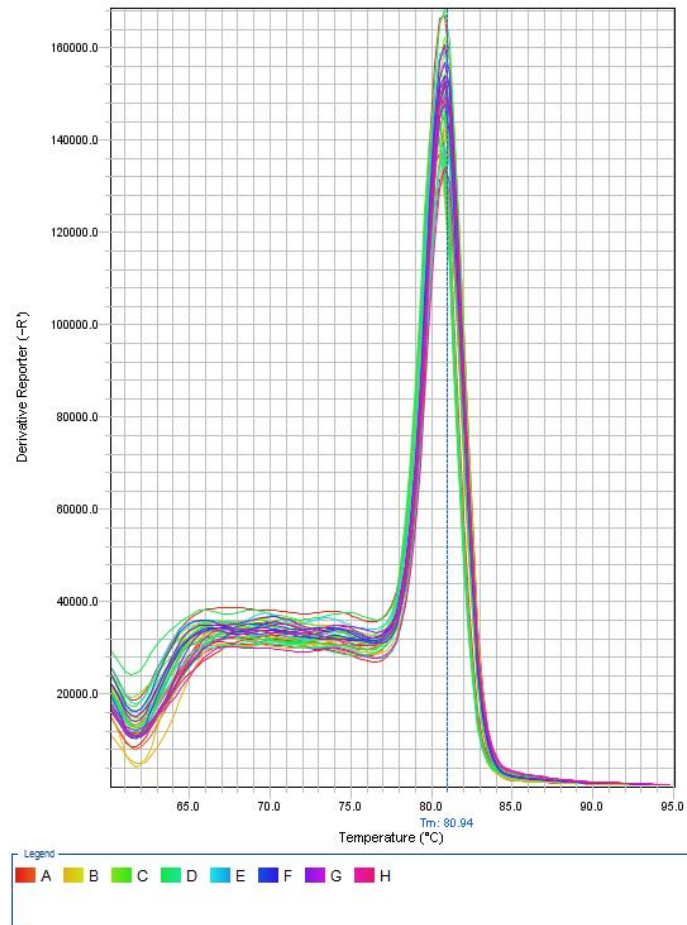

### GAPDH

#### Melt Curve

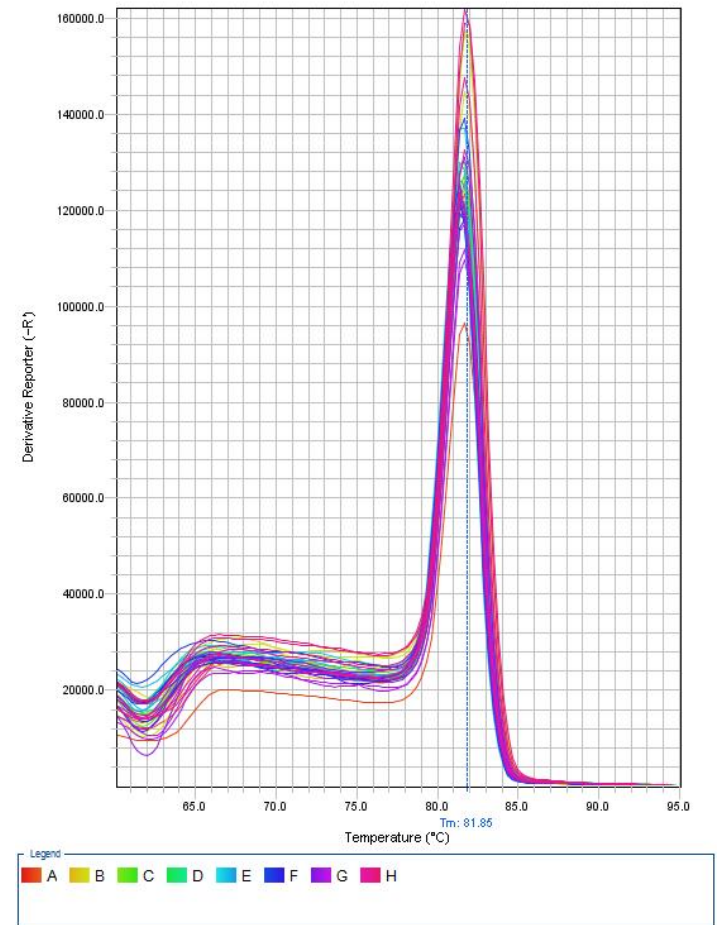



# qPCR curves

## Central nucleus of amygdala

### CRF

#### Melt Curve

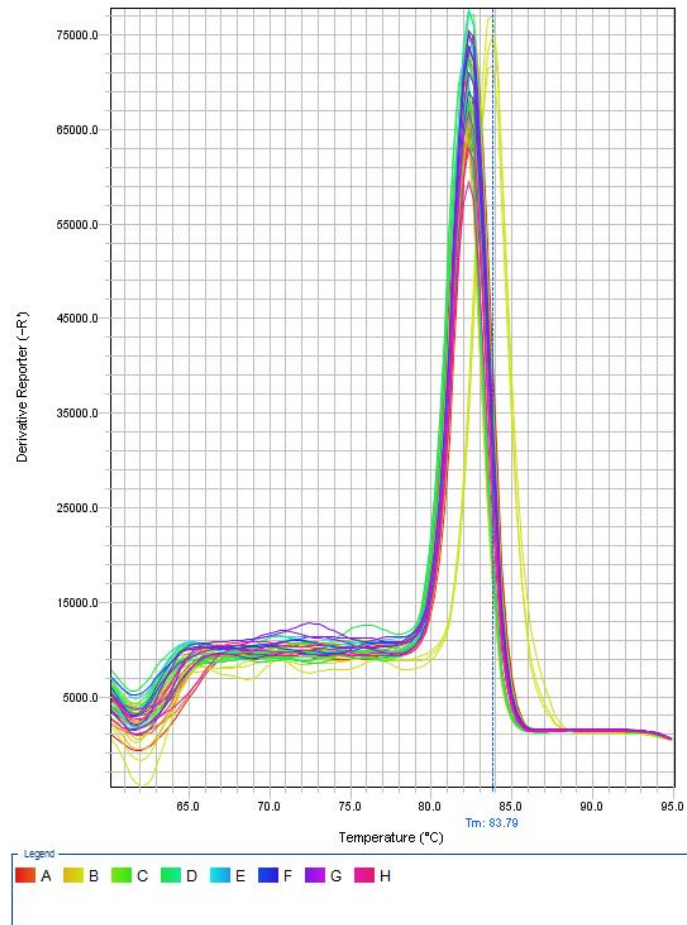

### GAPDH

#### Melt Curve

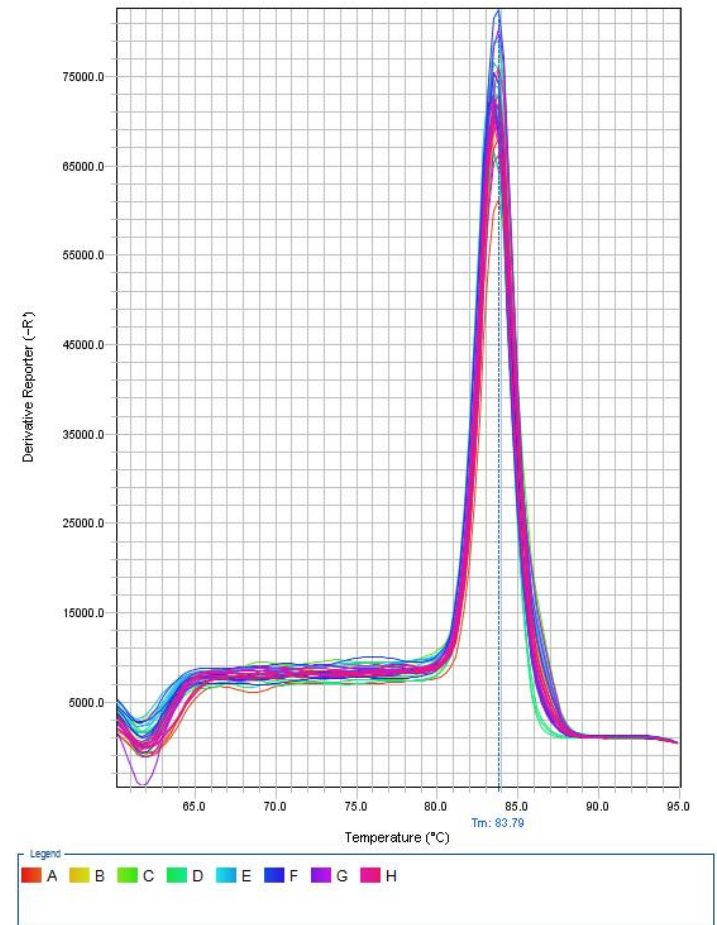



# qPCR curves

## Ventral tegmental area

### CRF

#### Melt Curve

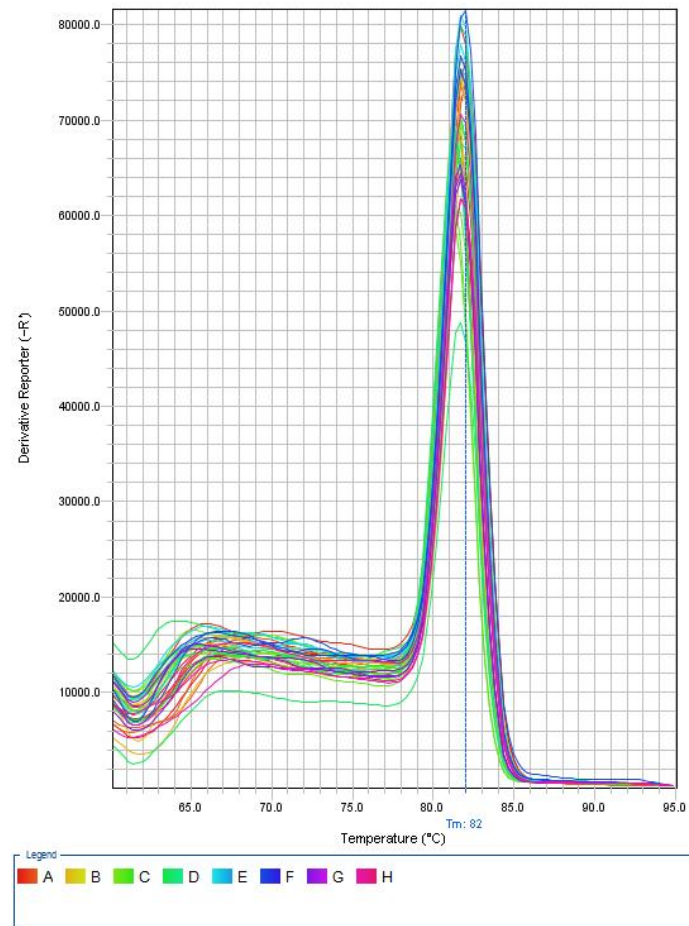

### GAPDH

#### Melt Curve

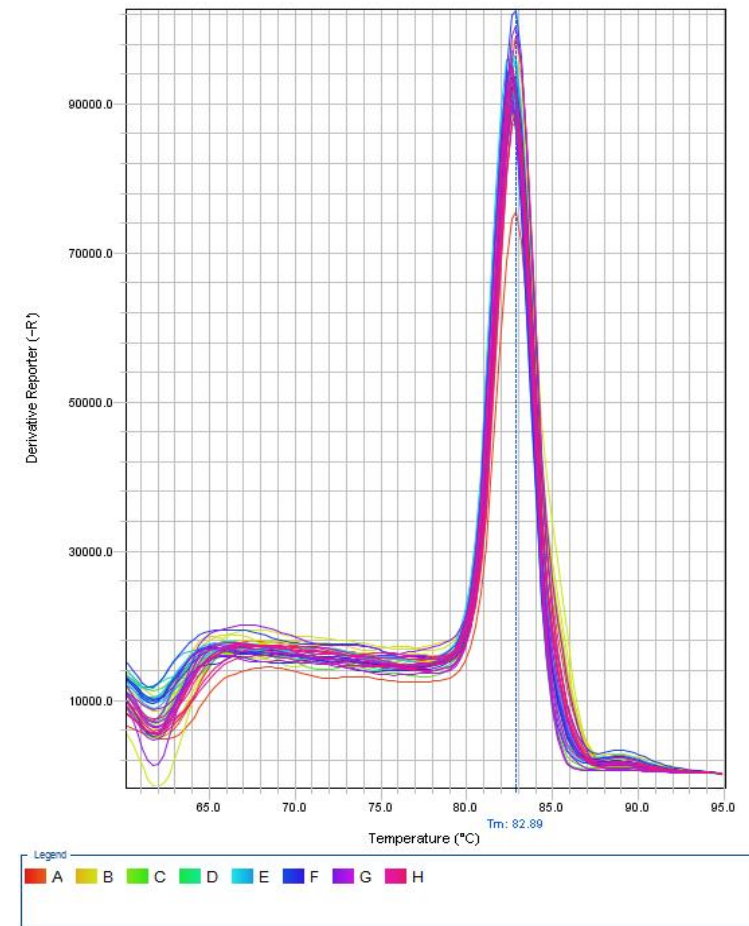

# qPCR curves

## Nucleus accumbens

### CRF

#### Melt Curve

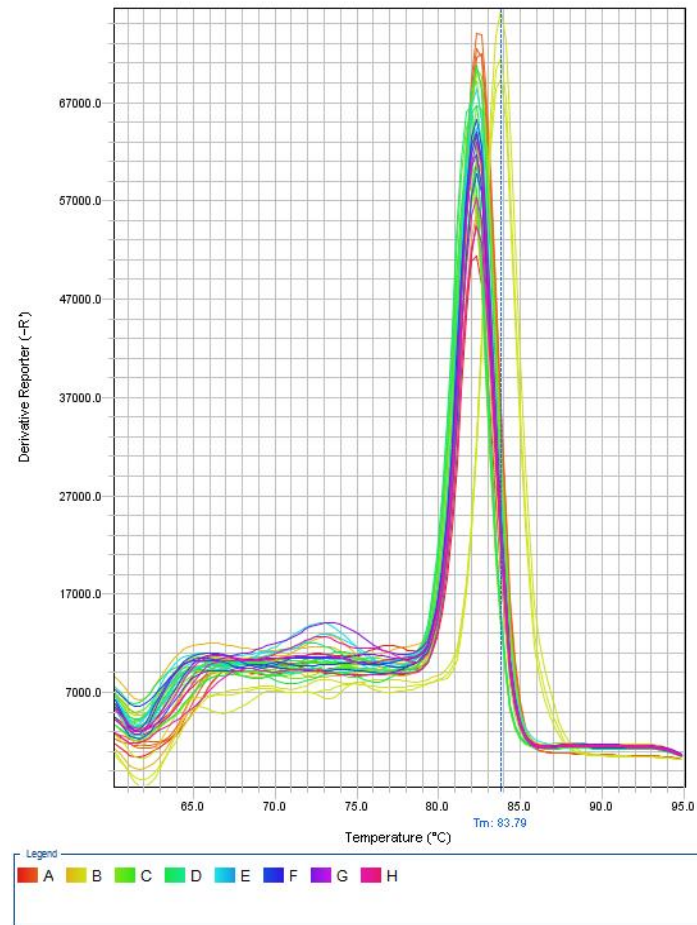

### GAPDH

#### Melt Curve

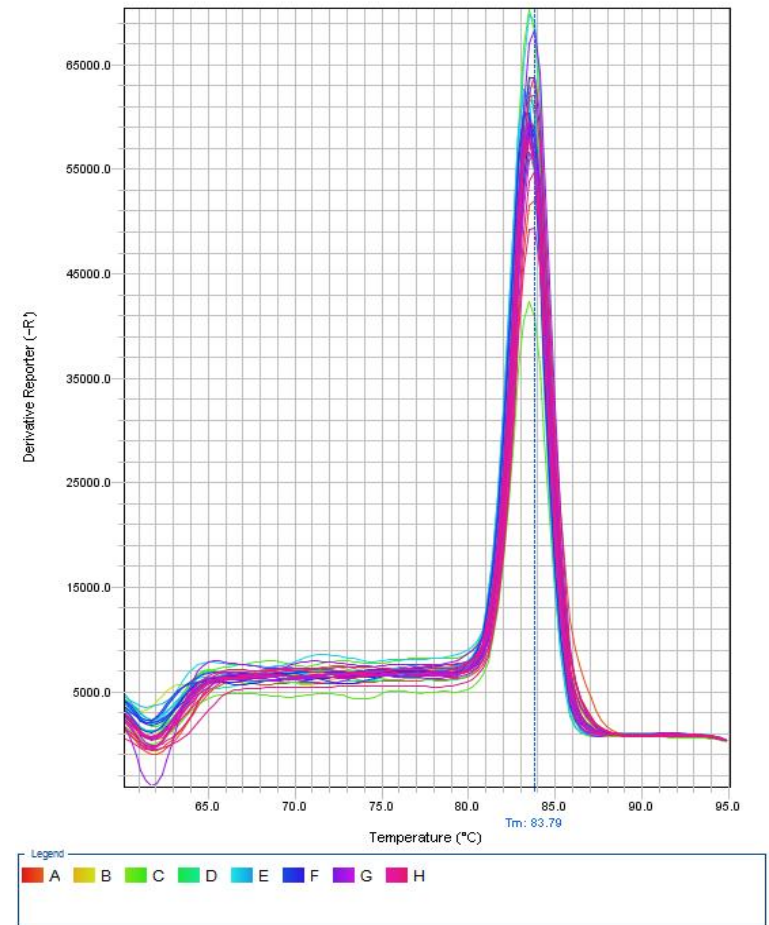

Supplement: NIHMS1677607-supplement-Supplementary_Material.pdf [file NIHMS1677607-supplement-Supplementary_Material.pdf]
